# Supplementary material for: New Advances in Metabolic Syndrome, from Prevention to Treatment: The Role of Diet and Food
Source: MDPI journal article supplement (doi:10.3390/nu15030640), 2023-01-26
Supplement: s1 [file s1]

## Supplementary Material

### Inclusion and exclusion criteria

The search was carried out using four electronic databases, MEDLINE (via PubMed), ISI Web of Science, Google Scholar, and Scopus. The following inclusion criteria were established: (a) full texts written only in English; (b) published over the last 10 years; (c) primary research articles; (d) combination of the following keywords: <foods> and <metabolomic syndrome>; <food components> and <metabolomic syndrome> in the title, abstract and keywords; (e) sampling consisting of products intended for human consumption.

Exclusion criteria were: (a) any publication lacking from a peer-review process (reports from public institutions and proceedings of conferences) or different reports from the same study (b) review, systematic review, meta-analysis, or book chapters.

**Table S1.** Summary list of all foods and food components that play a key role in the prevention and/or treatment of MetS.

| Foods/Foods components | Country | Study Design         | N° participants     | Exposure nutrients/ compounds                                                                                                                                                                                                                                                                                                                                                                     | Exposure assessment                                                                                                                                                                     | Treatment duration | Main outcome                                                                                                                                                                                                                                          | Ref.  |
|------------------------|---------|----------------------|---------------------|---------------------------------------------------------------------------------------------------------------------------------------------------------------------------------------------------------------------------------------------------------------------------------------------------------------------------------------------------------------------------------------------------|-----------------------------------------------------------------------------------------------------------------------------------------------------------------------------------------|--------------------|-------------------------------------------------------------------------------------------------------------------------------------------------------------------------------------------------------------------------------------------------------|-------|
| Seeds<br>Pumpkin seeds | Algeria | <i>In vivo</i> study | 24 male Wistar rats | <ul style="list-style-type: none"><li>• C group (20% casein)</li><li>• P group (20% casein and purified pumpkin seed proteins by oral at the dose of 1 g/kg/day)</li><li>• C-HF group (20% casein enriched with 64% fructose)</li><li>• P-HF group (20% casein, purified pumpkin seed proteins, administered by oral gavage, at the dose of 1 g/kg/day and enriched with 64% fructose).</li></ul> | Body weight, food intake, weight gain, food efficiency, BMI adiposity index, TNF- $\alpha$ and IL-6 levels (anti-inflammatory activity), HOMA-IR, HOMA- $\beta$ and insulinogenic index | 8 weeks            | Treatment with pumpkin seeds protein counteracted the fructose alteration by improving glucose, insulin, insulinogenic index, HOMA-IR, HOMA- $\beta$ , glucose tolerance and AUC, suggesting a protective role on complications associated with MetS. | [115] |

|                                                                             |                                   |                                                                        |                                                                                                                   |                                                                                                                                                                                                                                                                                                                                    |                                                                                                                                                                                         |          |                                                                                                                                                                                                                                   |       |
|-----------------------------------------------------------------------------|-----------------------------------|------------------------------------------------------------------------|-------------------------------------------------------------------------------------------------------------------|------------------------------------------------------------------------------------------------------------------------------------------------------------------------------------------------------------------------------------------------------------------------------------------------------------------------------------|-----------------------------------------------------------------------------------------------------------------------------------------------------------------------------------------|----------|-----------------------------------------------------------------------------------------------------------------------------------------------------------------------------------------------------------------------------------|-------|
| Seeds<br>Flaxseed                                                           | Iran                              | Randomized<br>controlled<br>clinical trial                             | 60<br>with MetS                                                                                                   | <ul style="list-style-type: none"> <li>• Group one was given 25 mL/day of flaxseed oil</li> <li>• Group two 25 mL/day of sunflower oil</li> </ul>                                                                                                                                                                                  | Coagulation score, total antioxidant capacity (TAC) and inflammatory parameters (IL-6)                                                                                                  | 8 weeks  | <p>Dietary intake of flaxseed oil as the main source of dietary fat could improve the inflammatory status among patients with MetS.</p> <p>No significant changes were observed in serum levels of TAC and coagulation score.</p> | [116] |
| Plants<br>Garlic ( <i>Allium sativum</i> L.)                                | Iran                              | Double-blind,<br>randomized<br>controlled<br>clinical trial            | 90                                                                                                                | <ul style="list-style-type: none"> <li>• The first group was given 4 garlic powder tablets per day (400 mg of garlic powder per tablet)</li> <li>• The second group received a placebo (also 4 times a day)</li> </ul> <p>Patients were asked to take two tablets one hour before lunch and another two one hour before dinner</p> | DBP and SBP, insulin resistance, body mass index, fatty liver, serum insulin index and appetite                                                                                         | 3 months | Garlic powder supplementation improved MetS, insulin resistance, FLI, and appetite.                                                                                                                                               | [119] |
| Plants<br>Artichoke<br>( <i>Cynara scolymus</i> )<br>leaf extracts<br>(ALE) | Iran                              | Double-blind<br>placebo-<br>controlled<br>randomized<br>clinical trial | 80<br>patients with MetS of<br>which only 68, however,<br>completed it                                            | <p>The subjects were divided into two groups:</p> <ul style="list-style-type: none"> <li>• the ALE group that received 1800 mg/day of artichoke leaf extracts distributed in 4 tablets per day</li> <li>• the placebo group that received tablets containing cornstarch, lactose and avicel</li> </ul>                             | Concentration of HDL-C, TG and FBS in serum. Monitoring the levels of glutathioneperoxidase (GPx) and superoxide dismutase (SOD) of red blood cells (RBC) and TAC(Antioxidant activity) | 12 weeks | ALE decreased serum ox-LDL level in patients with MetS, with no beneficial effects on other antioxidant indices.                                                                                                                  | [120] |
| Plants<br>Ginger ( <i>Zingiber officinale</i> Roscoe)                       | New South<br>Wales<br>(Australia) | <i>In vivo</i> and <i>in vitro</i> study                               | 35<br>rats divide in 5 groups<br>(7 rats for each group)<br>fed a diet rich in fat and<br>carbohydrates<br>(HFHC) | <ul style="list-style-type: none"> <li>• Group 1 was given a standard diet (control group)</li> <li>• Group 2 was HFHC control</li> <li>• Groups 3 and 4 were given ginger extracts (100 mg/kg and 200mg/kg per day)</li> <li>• Group 5 was treated with metformin (200 mg/kg)</li> </ul>                                          | Blood insulin concentration (in vivo study);<br>AMPKa phosphorylation in L6 skeletal muscles cells myotube and mRNA expression of PGC-1a (in vitro test)                                | 10 weeks | Ginger has beneficial effects on modulating glucose metabolism in rats fed a high-calorie diet and suggest that ginger may be effective in preventing the development of metabolic syndrome and type 2 diabetes.                  | [121] |

|                                               |       |                                                           |                                                                                                                                                                                                                                                                                                                                                                                                                                                                           |                                                                                                                                                                                         |                                                                                                                                                                                                                        |                                                                        |                                                                                                                                                                                                                                                                                                                                         |       |
|-----------------------------------------------|-------|-----------------------------------------------------------|---------------------------------------------------------------------------------------------------------------------------------------------------------------------------------------------------------------------------------------------------------------------------------------------------------------------------------------------------------------------------------------------------------------------------------------------------------------------------|-----------------------------------------------------------------------------------------------------------------------------------------------------------------------------------------|------------------------------------------------------------------------------------------------------------------------------------------------------------------------------------------------------------------------|------------------------------------------------------------------------|-----------------------------------------------------------------------------------------------------------------------------------------------------------------------------------------------------------------------------------------------------------------------------------------------------------------------------------------|-------|
| Nervine plants<br>Green and<br>roasted coffee | Spain | Randomized,<br>controlled,<br>crossover<br>clinical study | 52                                                                                                                                                                                                                                                                                                                                                                                                                                                                        | <ul style="list-style-type: none"><li>• 25 normocholesterolaemic (total cholesterol &lt; 200 mg/dL)</li><li>• 27 hypercholesterolaemic (total cholesterol &gt; 200–240 mg/dL)</li></ul> | Total soluble polyphenols and Methylxanthine were analysed by (HPLC–DAD). SBP and TBP, total body fat and WC, triglycerides and HDL-C, fasting glucose, fasting insulin concentration and insulin resistance (HOMA-IR) | 8 weeks +<br>3 weeks of<br>washout<br>stage + 8<br>weeks = 19<br>weeks | Regular consumption of a green/roasted coffee blend may be recommended to healthy and hypercholesterolaemic subjects to prevent MetS, as it produces positive effects on blood pressure, blood glucose and triglyceride levels, being particularly interesting for hypercholesterolaemic subjects as coffee improved the lipid profile. | [122] |
| Nervine plants<br>Yellow tea                  | China | <i>In vivo</i> study                                      | 22 rats divided into two<br>macrogroups: <ul style="list-style-type: none"><li>• Lepr<sup>-/-</sup> rats</li><li>• wild type (WT).</li></ul> WT rats were divided<br>into: <ul style="list-style-type: none"><li>• WT control group (WT)</li><li>• WT that were given tea water extract (LWE), (WL).</li></ul> Lepr <sup>-/-</sup> rats<br>were grouped into the<br>Lepr <sup>-/-</sup> control group<br>(KO) and the Lepr <sup>-/-</sup> with<br>LWE treated group (KL). | The rats were administered water or LWE (700 mg/kg BW) daily by oral gavage.                                                                                                            | Parameters evaluated: blood glucose, glucose tolerance, total cholesterol, triglyceride, fatty acids, weights of the liver, inguinal, epididymal adipose tissues, liver lipogenesis and gut microbiota                 | 24 weeks                                                               | LWE supplementation improved MetS in Lepr <sup>-/-</sup> rats by modulating gut microbiota composition and suppressing hepatic lipogenesis.                                                                                                                                                                                             | [123] |

|                                           |           |                                                                                                               |                                                                                                                                              |                                                                                                                                                                                                                              |                                                       |          |                                                                                                                                                                                                  |       |
|-------------------------------------------|-----------|---------------------------------------------------------------------------------------------------------------|----------------------------------------------------------------------------------------------------------------------------------------------|------------------------------------------------------------------------------------------------------------------------------------------------------------------------------------------------------------------------------|-------------------------------------------------------|----------|--------------------------------------------------------------------------------------------------------------------------------------------------------------------------------------------------|-------|
| Fruits<br>Cranberry<br>juice              | Brazil    | Clinical trial                                                                                                | 56                                                                                                                                           | • 0.7 litres/days cran-berry juice containing<br>0.4 mg folic acid                                                                                                                                                           | Biochemical<br>biomarkers                             | 2 months | The cranberry-treated<br>group showed:<br>↑ in adiponectin<br>↑ in folic acid and a<br>↓ in homocysteine.                                                                                        | [128] |
| Fruits<br>Bilberries and<br>blackcurrants | Australia | Clinical trial                                                                                                | 28<br>with MetS                                                                                                                              | • 320 mg anthocyanin supplements twice<br>dai-ly                                                                                                                                                                             | Biochemical<br>biomarkers                             | 4 weeks  | Consumption of anthocyanin supplements<br>improves in cardiometabolic biomarkers<br>and ↓ reduces the risk of thrombosis.                                                                        | [129] |
| Fruits<br>Bergamots                       | Italy     | Randomized,<br>double-blind,<br>placebo-<br>controlled                                                        | • 104 patients with<br>hypercholesterolemia.<br>• 42 patients with<br>hyperlipidemia<br>• 59 patients with<br>hyperlipidemia and<br>glycemia | 1) oral dose of bergamot extract (500<br>mg/day; A1, B1 and C1)<br>2) 1000 mg/day of BPF (A2, B2 and C2)<br>3) placebo (APL, BPL, and CPL).                                                                                  | Hyperlipide-mic and<br>hyperglycemic blood parameters | 1 month  | The consumption of bergamot extract:<br>↓ reduces total and LDL-C levels,<br>↓ triglyceride levels and by a significant<br>decrease in blood glucose.                                            | [132] |
|                                           | Italy     | Randomized,<br>double-<br>blind,placebo<br>-controlled,<br>three-arm,<br>parallel-<br>group clinical<br>trial | 90                                                                                                                                           | 2 pills of either active treatment contained:<br>• bergamot extract<br>(120-mg flavonoids/<br>pill)<br>• 120-mg phytosterols/pill<br>• dry artichoke extract (2-mg chlorogenic<br>acid/pill)<br>• 20-mg vitamin C or placebo | Biochemical<br>biomarkers                             | 8 weeks  | After treatment, all active-treated groups<br>experienced a significant improvement in<br>triglycerides and in low-density lipoprotein<br>cholesterol versus baseline and placebo<br>treatments. | [133] |
| Fruits<br>Walnuts                         | Korea     | Randomized,<br>controlled,<br>crossover<br>study                                                              | 119                                                                                                                                          | 45 g of walnuts/day                                                                                                                                                                                                          | Blood samples analysis and plasma<br>lipid extraction | 16 weeks | A dietary supplement favorably changed<br>MetS status by increasing the concentration<br>of HDL-C and ↓ decreasing fasting glucose<br>level.                                                     | [135] |

|                       |       |                                         |                                                                                                             |                                                                                                                                                                                                                                                                                                                                     |                                                      |           |                                                                                                                                                                                                                                                                                                    |       |
|-----------------------|-------|-----------------------------------------|-------------------------------------------------------------------------------------------------------------|-------------------------------------------------------------------------------------------------------------------------------------------------------------------------------------------------------------------------------------------------------------------------------------------------------------------------------------|------------------------------------------------------|-----------|----------------------------------------------------------------------------------------------------------------------------------------------------------------------------------------------------------------------------------------------------------------------------------------------------|-------|
| Legumes<br>Black bean | USA   | Randomized, controlled, crossover trial | 36<br>• black bean meal (n=12)<br>• fiber-matched meal (n=12)<br>• antioxidant capacity matched meal (n=12) | <ul style="list-style-type: none"> <li>black bean meal consisted of the moderate-fat meal and a soup made from dried black bean</li> <li>fiber matched soup was matched for the soluble and insoluble dietary fiber of black beans</li> <li>antioxidant capacity matched was supplemented with 300 mg grape seed extract</li> </ul> | Biochemical measurements                             | 5 hours   | The inclusion of black beans with a typical Western-style meal attenuates postprandial insulin and moderately enhances postprandial antioxidant endpoints in adults with MetS.                                                                                                                     | [137] |
| Legumes<br>Soy        | Iran  | Randomized crossover study              | 42 postmenopausal women with MetS                                                                           | 1) control diet red meat<br>2) diet with soy-nut<br>3) diet with soy-protein 30 g/day                                                                                                                                                                                                                                               | Body weight and biochemical biomarkers               | 8 weeks   | Soy as a replacement for red meat in eating plan had beneficial effects on features of the MetS, soy-nut being more effective than soy-protein. Soy-nut consumption may ↓ insulin resistance and ↑ glycemic control and lipid concentrations in post-menopausal women with the metabolic syndrome. | [138] |
|                       | Italy | Randomized controlled trial             | 28                                                                                                          | 30 g/day soy protein                                                                                                                                                                                                                                                                                                                | Biochemical and immunometric assays                  | 12 weeks  | At the end of the treatment period, 50% of subjects on soy food showed a ↓ reduction in the number of MetS features.                                                                                                                                                                               | [139] |
| Cereals               | Korea | Cross-sectional study                   | 6845<br>No diabeto, hypertension or dyslipidemia                                                            | Dietary carbohydrate intake assessment (including total carbohydrate, energy from carbohydrates,                                                                                                                                                                                                                                    | FFQ<br>Anthropometric measurements<br>Blood analyses | 2007-2009 | Percentage of energy from carbohydrates in men.<br>↓ DBP<br>↓ HDL-C level<br>↑ triglyceride levels                                                                                                                                                                                                 | [141] |

|                   |                                          |                                                                |                                                                                                                                                             |                                                                                                                                    |                    |                                                                                                                                                                                                                                                                                                                             |       |
|-------------------|------------------------------------------|----------------------------------------------------------------|-------------------------------------------------------------------------------------------------------------------------------------------------------------|------------------------------------------------------------------------------------------------------------------------------------|--------------------|-----------------------------------------------------------------------------------------------------------------------------------------------------------------------------------------------------------------------------------------------------------------------------------------------------------------------------|-------|
|                   |                                          |                                                                | dietary glycaemic index, dietary glycaemic load, total grains, refined grains, and white rice)                                                              |                                                                                                                                    |                    | ↑ fasting blood glucose levels<br>rice intake in women<br>↑ systolic blood pressure<br>↑ fasting blood glucose<br>↑ triglyceride levels<br>↓ HDL-C level                                                                                                                                                                    |       |
| Italy and Filland | Randomized control trials                | 123                                                            | 1) Diet based on whole-grain cereal products<br>2) Diet based on refined cereal products                                                                    | Blood plasma analyses                                                                                                              | 12 weeks           | Insulin sensitivity indices and secretion (SI, QUICKI, DI, dAIRG) and lipids and inflammatory markers concentrations (hs-CRP, IL-6, IL-1ra, and TNF-α) no changes after the intervention, and between groups.                                                                                                               | [146] |
| Italy             | Randomized controlled intervention study | 54                                                             | 1) Diet based on whole-grain cereal products<br>2) Diet based on refined cereal products                                                                    | Blood plasma analyses (postprandial glucose, insulin and lipid metabolism)                                                         | 12 weeks           | With respect to the run-in period:<br>↓ 29% postprandial insulin<br>↓ 43% triglyceride responses with respect to group 2:<br>postprandial insulin triglyceride responses were significantly lower.                                                                                                                          | [147] |
| China             | Cohort study                             | 2892 Healthy adults<br>1088 Northern China<br>1804 South China | Quartiles of monthly consumption of rice, wheat and products, coarse, tuber                                                                                 | Semiquantitative FFQ<br>Anthropometric, blood pressure, and biochemical measurements                                               | 6 years follow-up  | Rice consumption was inversely associated with a risk of MetS<br>wheat and wheat products was positively associated with a risk of MetS.                                                                                                                                                                                    | [148] |
| Korea             | Cohort study                             | 5717 without MetS                                              | Grain consumption (whole grains or refined grains) classified:<br>Rare consumers: <1 serving/d,<br>1 to <3 servings/d,<br>Frequent consumers: ≥3 servings/d | Semiquantitative FFQ<br>Anthropometric, blood pressure, and biochemical measurements                                               | 10 years follow-up | Frequent consumers of whole grains had a lower risk of incident MetS, of abdominal obesity, high blood glucose, hypertriglyceridemia, and elevated blood pressure.<br>Frequent consumption of refined grains was associated with a higher risk of all 5 components of MetS in women.<br>hypertriglyceridemia, and low HDL-C | [149] |
| China             | Case-control study                       | 667 with MetS                                                  | whole-grain wheat and rye intake                                                                                                                            | Plasma DHPPA concentrations<br>Anthropometric measures                                                                             |                    | Higher plasma DHPPA concentrations were associated with lower risk of MetS.                                                                                                                                                                                                                                                 | [150] |
|                   | <i>In vivo</i> study                     | 7 week-old male Wistar rats                                    | Cholesterol enriched diet with:<br>1) 20% of RP-A<br>2) 20% RP-E<br>3) 20% CAS                                                                              | Plasma analyses (amino acid, glucose, albumin, lipids, lipoprotein)<br>Deposit of fat<br>Liver lipid analyses<br>Enzyme activities | 2 weeks            | Group 1 and 2<br>↓ body weight gain,<br>↓ plasma glucose and lipid levels,<br>↓ hepatic lipids accumulation<br>↓ fatty acid synthase,                                                                                                                                                                                       | [151] |

|                    |        |                       |                                                                                                                                                  |                                                                                                                                                                                  |                                                                                                          |                    |                                                                                                                                                                                                                                                       |       |
|--------------------|--------|-----------------------|--------------------------------------------------------------------------------------------------------------------------------------------------|----------------------------------------------------------------------------------------------------------------------------------------------------------------------------------|----------------------------------------------------------------------------------------------------------|--------------------|-------------------------------------------------------------------------------------------------------------------------------------------------------------------------------------------------------------------------------------------------------|-------|
|                    |        |                       |                                                                                                                                                  |                                                                                                                                                                                  |                                                                                                          |                    | ↓ glucose 6-phosphate dehydrogenase<br>↓ malate dehydrogenase<br>No significant differences were observed between Group 1 and 2.                                                                                                                      |       |
| Olive and fish oil | Brazil | Clinical trial        | • fish oil group (n=21)<br>• extra-virgin olive oil group (n=13)<br>• fish oil and extra-virgin olive oil group (n=26)<br>• control group (n=42) | 1) 3 g/d of fish oil n-3 fatty acids;<br>2) 10 mL/d of extra-virgin olive oil at lunch and dinner;<br>3) 3 g/d of fish oil n-3 fatty acids and 10 mL/d of extra-virgin olive oil | Biochemical and inflammatory biomarkers measurements, and anthropometric and blood pressure measurements | 3 months           | Increased dietary n-3 polyunsaturated fatty acids and extra virgin olive oil have beneficial synergistic effects on lipid metabolism and oxidative stress in patients with MetS                                                                       | [155] |
| Olive oil          | Italy  | Clinical trial        | 25                                                                                                                                               | 10 g/day extra virgin olive oil                                                                                                                                                  | Biochemical biomarkers                                                                                   | After 2 h meal     | After 2 h after meal, subjects who assumed a meal with EVOO had significantly lower blood: ↓ glucose<br>↓ DPP-4 protein and activity<br>↓ LDL-C and ox-LDL<br>↑ higher insulin,<br>↑ GLP-1<br>↑ GIP<br>EVOO improves post-prandial glucose and LDL-C. | [154] |
| Omega 3            | USA    | Cross-sectional study | 4941                                                                                                                                             | Quintiles of dietary ω-3 fatty acids (g/d)<br>Q1: 0.00-0.07 (n=970)<br>Q2: 0.08-0.14 (n=1070)<br>Q3: 0.15 – 0.21 (n= 918)<br>Q4: 0.22 – 0.37 (n=1009)<br>Q5: 0.38 – 5.65 (n=974) | FFQ                                                                                                      | N/A                | Dietary ω-3 PUFAs were not associated with prevalent MetS (p for trend = 0.97).                                                                                                                                                                       | [163] |
|                    | Iran   | Cross-sectional study | 420 Female adults                                                                                                                                | Energy-adjusted fish intake (g/day) Tertiles:<br>Never or less than 1/month<br>1-3 times/month<br>1 time/week<br>2-4 times/week<br>5-6 times/week<br>1-2 times/day               | Semiquantitative FFQ                                                                                     | 1 year             | Highest tertile of fish intake were 65% less likely to have the MetS than those in the lowest tertile high fish intake<br>↓ hypertriglyceridemia ↑ HDL<br>↓ blood pressure                                                                            | [168] |
|                    | Iran   | Cohort study          | 3382 adults                                                                                                                                      | Canned and non-canned fish consumption:<br>- < 30 g/week                                                                                                                         | FFQ                                                                                                      | 3.6 year follow-up | ↓ incidence of MetS in > 45 g/week group                                                                                                                                                                                                              | [169] |

|           |                       |                                                  |                                                                                                                                                                                                                                                                                         |                                                                                                                              |                           |                                                                                                                                                                                                                                                                                 |           |
|-----------|-----------------------|--------------------------------------------------|-----------------------------------------------------------------------------------------------------------------------------------------------------------------------------------------------------------------------------------------------------------------------------------------|------------------------------------------------------------------------------------------------------------------------------|---------------------------|---------------------------------------------------------------------------------------------------------------------------------------------------------------------------------------------------------------------------------------------------------------------------------|-----------|
|           |                       |                                                  | - 30-45 g/week<br>- > 45 g/week                                                                                                                                                                                                                                                         |                                                                                                                              |                           |                                                                                                                                                                                                                                                                                 |           |
| Iran      | Cross-sectional study | 2451 adults                                      | Intake of ALA, EPA and DHA<br>Content of $\omega$ 3 and $\omega$ 6 PUFAs                                                                                                                                                                                                                | Semiquantitative FFQ<br>Anthropometric measurements<br>blood pressure<br>fasting plasma concentrations of glucose and lipids | followed up every 3 years | Highest quartile of ALA and $\omega$ -6 fatty acid intakes had a 38% and a 0.47% lower prevalence of MetS, respectively<br>$\omega$ -6/ $\omega$ -3 PUFA ratio was not associated with a decrease in the prevalence of the MetS.                                                | [170]     |
| USA       | Cohort study          | 4356<br>Young adults free from MetS and diabetes | Fish intake:<br><1/month;<br>1–3/month;<br>1/week;<br>2–4/week;<br>≥5/week.<br>Fish oil<br>(Quintiles, median (g/day)):<br>Q1: 0.03;<br>Q2: 0.07;<br>Q3: 0.11;<br>Q4: 0.18;<br>Q5: 0.33.                                                                                                | FFQ                                                                                                                          | 25 year follow-up         | 1069 incident cases of MetS<br>$\omega$ 3-PUFA intake inversely associated with the incidence of MetS in a dose–response manner (hazards ratio of incident MetS was 0.54 (P for linear trend < 0.01) as compared the highest to the lowest quintile of $\omega$ 3-PUFA intake). | [171]     |
| Korea     | Cross-sectional study | 1520<br>Prediabetes and normal                   | Fish consumption:<br>1) ≤ 17.0 g/day<br>2) 18.0–93.0 g/day<br>3) ≥ 94 g/day                                                                                                                                                                                                             | FFQ<br>Blood samples                                                                                                         | N/A                       | 18.0–93.0 g/day fish consumption<br>↓ total cholesterol 0.422 fold<br>≥ 94 g/day fish consumption<br>↓ total cholesterol 0.555 fold<br>↑ LDL-C 2.482 fold                                                                                                                       | [172]     |
| Norway    | Cross-sectional study | 23907 adults                                     | Fish (fatty, lean and processed) consumption per week:<br>Never<br><1<br>1<br>2–3<br>4–5<br>Approximately every day                                                                                                                                                                     | FFQ<br>Anthropometric measurements<br>Blood samples                                                                          | 13-year follow-up study   | Lean fish consumption once a week or more<br>↓ future metabolic score, ↓ triglycerides<br>↑ HDL-C<br>↓ WC (men)<br>↓ blood pressure<br>Fatty fish consumption<br>↑ WC<br>↑ HDL-C (men)                                                                                          | [173,174] |
| Australia | <i>In vivo</i> study  | High-fat induced MetS male Wistar rats           | 1) corn starch (C; weighing 340±2 g)<br>2) corn starch+ALA-rich chia oil (CA; 339±2 g)<br>3) corn starch+EPA oil (CE; 338±1 g)<br>4) corn starch+DHA oil (CD; 337±2 g)<br>5) high-carbohydrate, high-fat (H; 339±3 g)<br>6) high carbohydrate, high-fat+ALA-rich chia oil (HA; 336±2 g) | Cardiovascular measurements<br>Body composition measurements<br>Fatty acids profile<br>Plasma biochemistry<br>Histology      | 8 weeks                   | ALA<br>induced lipid redistribution away from the abdominal area<br>↓ glucose tolerance<br>↓ insulin sensitivity<br>↓ dyslipidemia<br>↓ hypertension and left ventricular dimensions. EPA and DHA                                                                               | [175]     |



|        |                                                       |                                   |                                                                                                                                                                                                                                       |                                                                                                                                                                                      |          |                                                                                                                                                                                                                                                                                                                                      |       |
|--------|-------------------------------------------------------|-----------------------------------|---------------------------------------------------------------------------------------------------------------------------------------------------------------------------------------------------------------------------------------|--------------------------------------------------------------------------------------------------------------------------------------------------------------------------------------|----------|--------------------------------------------------------------------------------------------------------------------------------------------------------------------------------------------------------------------------------------------------------------------------------------------------------------------------------------|-------|
|        |                                                       |                                   | 7) high-carbohydrate, high-fat+EPA oil (HE; 332±2 g)<br>8) high-carbohydrate, high-fat+DHA oil (HD; 337±1g)                                                                                                                           |                                                                                                                                                                                      |          | ↑ sympathetic activation<br>↓ reduced abdominal adiposity<br>↓ total body fat<br>↓ insulin sensitivity<br>↓ dyslipidemia<br>↓ hypertension and left ventricular stiffness<br>ALA, EPA and DHA<br>↓ inflammation in both the heart and the liver<br>↓ cardiac fibrosis<br>↓ hepatic steatosis<br>↓ stearoyl-CoA desaturase 1 activity |       |
| Brazil | Randomized controlled trial                           | 87 postmenopausal women with MetS | Diet plus 900 mg of $\omega$ -3s/day                                                                                                                                                                                                  | Anthropometric measurements<br>Blood analyses                                                                                                                                        | 24 weeks | ↓ SBP(-12.2%) blood pressure<br>↓ DBP (-8.2%)<br>↓ serum triglycerides concentration (-21.4%)<br>↓ insulin resistance (-13.1%) (P<0.05)<br>↓ serum IL-6 concentration (-28.5%) (P=0.034)                                                                                                                                             | [176] |
| USA    | Randomized, single-blind, parallel intervention study | 59 with early-stage T2D or MetS   | Dietary Supplementation with:<br>1) corn oil (CO)<br>2) botanical oil (BO) combination enriched in alpha-linolenic, gamma-linolenic, and stearidonic acids<br>3) fish oil (FO) enriched in eicosapentaenoic and docosahexaenoic acids | Blood analyses<br>Fatty Acids profile                                                                                                                                                | 8 weeks  | BO<br>↓ total and LDL-C levels<br>FO<br>↓ serum triglycerides<br>↓ hemoglobin A1c<br>↑ HDL-cholesterol                                                                                                                                                                                                                               | [177] |
| Spain  | Double-blind randomized intervention                  | 36 with MetS                      | High-intensity interval training and diet:<br>1) 500 mL/day of semi-skim milk (8 g of fat; placebo milk)<br>2) 500 mL/day of skim milk enriched with 275 mg of $\omega$ -3PUFA and 7.5 g of oleate ( $\omega$ -3+OLE)                 | Anthropometric measurements<br>Cardiometabolic measurements<br>Blood analyses<br>Insulin sensitivity                                                                                 | 24 weeks | $\omega$ -3+OLE<br>↑ HDL<br>↓ area under the curve of insulin concentration<br>↓ circulating proinflammatory stress                                                                                                                                                                                                                  | [178] |
| Spain  | Multicenter randomized crossover clinical trials      | 273 with MetS                     | 1) 100 g/d of white fish (Namibia hake) with advice on a healthy diet<br>2) health diet avoiding fish                                                                                                                                 | Lipid profile<br>individual components of the MetS<br>serum insulin concentrations<br>homeostasis model of insulin resistance<br>serum C-reactive protein<br>serum fatty acid levels | 8 weeks  | ↓ WC (P < 0.001)<br>↓ DBP(P Z 0.014)<br>↓ serum LDL concentrations (P Z 0.048)<br>↑ serum EPA and DHA fatty acids (P < 0.001)                                                                                                                                                                                                        | [179] |

|                                    |                   |                                               |                                                                                    |                                                                                                                                                                                                                                                                                                   |                                                                                                                  |                      |                                                                                                                                                                                                                                                                                 |       |
|------------------------------------|-------------------|-----------------------------------------------|------------------------------------------------------------------------------------|---------------------------------------------------------------------------------------------------------------------------------------------------------------------------------------------------------------------------------------------------------------------------------------------------|------------------------------------------------------------------------------------------------------------------|----------------------|---------------------------------------------------------------------------------------------------------------------------------------------------------------------------------------------------------------------------------------------------------------------------------|-------|
| Polyphenols<br>Flavonoids          | Spain             | Randomized<br>controlled<br>trial             | 200<br>with high cardiovascular<br>risk                                            | Participants in both Med-diet intervention<br>groups were given personalized advice<br>about dietary changes<br><br>1)Med-EVOO participants received free<br>EVOO (1 L/wk)<br><br>2)Med-nuts group was provided with<br>mixed nuts (30 g/d, as 15 walnuts, 7.5 g<br>almonds, and 7.5 g hazelnuts) | Anthropometrics and clinical<br>parameters were measured as well as<br>BP, plasma NO and TPE in urine<br>samples | 4,8 years            | Flavonoids increase of endothelial nitric<br>oxide synthase (eNOS) expression and thus<br>nitric oxide production.                                                                                                                                                              | [187] |
|                                    | United<br>Kingdom | Health<br>professionals<br>follow-up<br>study | 43880<br>healthy participants who<br>had no prior diagnosed<br>CVD or cancer       | -                                                                                                                                                                                                                                                                                                 | FFQ                                                                                                              | 24 years             | Higher intakes of fruit-based flavonoids<br>were associated with a lower risk of<br>nonfatal MI and ischemic stroke in men.                                                                                                                                                     | [193] |
|                                    | Netherlands       | Prospective<br>cohort<br>studies              | 774<br>elderly Dutch men                                                           | • 15.2 mg/day of catechin                                                                                                                                                                                                                                                                         | Evaluation of risk of CHD mortality                                                                              | 25 years             | The risk for death from CVD and CHD<br>decreased by catechin intake.                                                                                                                                                                                                            | [194] |
|                                    | Italy             | Randomized<br>controlled<br>trial             | 90<br>elderly individuals<br>without clinical evidence<br>of cognitive dysfunction | Consume daily drink containing:<br>• 993 mg [high flavanol (HF)]<br>• 520 mg [intermediate flavanol (IF)]<br>• 48 mg [low flavanol (LF)] cocoa flavanols<br>(CFs)                                                                                                                                 | Parameters evaluated: body and<br>visceral fat weights, and hepatic free<br>fatty acids                          | 8 weeks              | This dietary intervention study provides<br>evidence that regular CF consumption can<br>reduce some measures of age-related<br>cognitive dysfunction, possibly through an<br>improvement in insulin sensitivity.                                                                | [196] |
|                                    | Japan             | Cohort study                                  | 272<br>without clinical CVD,<br>type 1 diabetes or other<br>severe diseases        | -                                                                                                                                                                                                                                                                                                 | Questionnaire for lifestyle habits,<br>physical examination and laboratory<br>assessment                         | From 2002<br>to 2007 | Equol-producers (individuals with the<br>ability to produce equol are termed 'equol-<br>producers') showed a decrease incidence of<br>CAC, but there was no significant<br>association between dietary isoflavones and<br>CAC.                                                  | [197] |
|                                    | America           | Prospective<br>cohorts study                  | 124086                                                                             | All participants self-reported their diet<br>every four years                                                                                                                                                                                                                                     | Validated<br>semiquantita-<br>tive FFQ                                                                           | From 1986<br>to 2011 | Higher intake of foods rich in flavonols,<br>flavan-3-ols, anthocyanins, and flavonoid<br>polymers may contribute to weight<br>maintenance in adultho-<br>od and may help to refine dietary<br>recommendations for the prevention of<br>obesity and its potential consequences. | [198] |
| Polyphenols<br>Chlorogenic<br>acid | China             | <i>In vivo</i> study                          | 40<br>male Sprague-Dawley<br>rats                                                  | Rats were divided in four groups:<br>1) normal diet<br>2) high-fat diet                                                                                                                                                                                                                           | Body and visceral fat weights, and<br>hepatic free fatty acids                                                   | 12 weeks             | Chlorogenic acid sup-<br>pressed in dose-dependent manner<br>increases in body and visceral fat weights,                                                                                                                                                                        | [199] |

|           |                                                               |                                                                                                    |                                                                                                                                                                                           |                                                                                                                                                  |           |                                                                                                                                                                                                                                                        |       |
|-----------|---------------------------------------------------------------|----------------------------------------------------------------------------------------------------|-------------------------------------------------------------------------------------------------------------------------------------------------------------------------------------------|--------------------------------------------------------------------------------------------------------------------------------------------------|-----------|--------------------------------------------------------------------------------------------------------------------------------------------------------------------------------------------------------------------------------------------------------|-------|
|           |                                                               |                                                                                                    | 3) high-fat diet with a low dose of chlorogenic acid (20 mg/kg body weight)<br>4) high-fat diet with a high dose of chlorogenic acid (90 mg/kg body weight)                               |                                                                                                                                                  |           | and hepatic free fatty acids induced by high-fat diet.                                                                                                                                                                                                 |       |
| Singapore | <i>In vivo</i> study                                          | 20 Leprdb/db mice and four C57BL/6 mice (control group)                                            | The mice were treated daily with:<br>1) vehicle<br>2) 250 mg/kg BW metformin by oral gavage<br>3) 50 mg/kg BW chlorogenic acid, daily                                                     | G6Pase expression and activity, hepatic steatosis, lipid profiles and skeletal muscle glucose uptake, glucose tolerance, and insulin sensitivity | 2 weeks   | CGA inhibited hepatic G6Pase expression and activity, attenuated hepatic steatosis, improved lipid profiles and skeletal muscle glucose uptake, which in turn improve fasting glucose levels, glucose tolerance, insulin sensitivity and dyslipidemia. | [200] |
| China     | <i>In vivo</i> study                                          | 32 female C57BL/BKS mice divided in four groups (two control group and two chlorogenic acid group) | • CGA (80 mg/kg BW) once daily                                                                                                                                                            | Body fat, fasting plasma glucose, and glycosylated hemoglobin (HbA1c)                                                                            | 12 weeks  | Compared to the control group, the percentage of body fat, fasting plasma glucose, and HbA1c significantly decreased ( $p < 0.05$ ) in the chlorogenic acid group.                                                                                     | [202] |
| China     | <i>In vivo</i> study                                          | 40 rats                                                                                            | Rats were divided into four groups<br>1-2) chlorogenic acid: 1 mg/kg BW/day and 10 mg/kg BW/day (together with a diet rich in cholesterol).<br>3) normal diet<br>4) cholesterol-rich diet | Levels of LDL and HDL cholesterol                                                                                                                | 28 days   | High doses of 5-CQA significantly reduced total and LDL-C and increased HDL-C.                                                                                                                                                                         | [203] |
| Australia | Randomized, double-blind, placebo-controlled, crossover trial | 23 healthy subjects                                                                                | Subjects were treated with 400 mg of 5-CQA dissolved in 200 mL of low nitrate water                                                                                                       | Evaluation of endothelial function - blood samples analysis - sanguine pressure measurement                                                      | Only time | Decrease in both SBP and DBP (−2.41 and 1.53 mmHg) in subjects treated with chlorogenic acid.                                                                                                                                                          | [204] |

|                |       |                                                         |                                    |                                                                                                                                                                                                                                                                                |                                                  |              |                                                                                                                                                                                                                                                                       |       |
|----------------|-------|---------------------------------------------------------|------------------------------------|--------------------------------------------------------------------------------------------------------------------------------------------------------------------------------------------------------------------------------------------------------------------------------|--------------------------------------------------|--------------|-----------------------------------------------------------------------------------------------------------------------------------------------------------------------------------------------------------------------------------------------------------------------|-------|
| Curcumin v3o9l | China | <i>In vitro</i> study                                   | -                                  | • 0–50 µM curcumin on 24, 48, or 72 h                                                                                                                                                                                                                                          | MTT assay on 3T3-L1 preadipocytes                | 10 days      | <ul style="list-style-type: none"> <li>• MCE inhibition- PPAR<math>\gamma</math> and C/EBP<math>\alpha</math> expression regulation;</li> <li>• Decrease lipids accumulation.</li> </ul>                                                                              | [210] |
|                | Italy | Randomized and controlled clinical trial                | 44 patients with obesity           | Food supplement formulated to be enteric-coated and containing 800 mg/dose daily of <i>Curcuma longa</i> extract (95% of curcumin) complexed with sunflower phospholipids (20% phosphatidylserine) and blended with 8 mg/dose/die of piperine from <i>Piper nigrum</i> extract | Anthropometric measurements and body composition | 30 days      | <ul style="list-style-type: none"> <li>• IL-6 and TNF-<math>\alpha</math> levels reduction due to the curcumin;</li> <li>• Piperine addition improve the bioavailability and it reduced curcumin urinary excretion.</li> </ul>                                        | [211] |
|                | Iran  | Phase III randomized double-blind/parallel group design | 117 with MetS                      | <ul style="list-style-type: none"> <li>• Curcuminoids (1 g/day)</li> <li>+</li> <li>piperine (10 mg/day)</li> </ul>                                                                                                                                                            | Blood samples                                    | 8 weeks      | <ul style="list-style-type: none"> <li>• Significant reduction in SOD, MDA and CRP inflammation levels;</li> <li>• Improvement in lipid profile, total and LDL-C, HDL-LDL C, and TG;</li> <li>• Increased bioavailability of curcuminoids due to piperine.</li> </ul> | [212] |
|                | Egypt | <i>In vivo</i> study                                    | 110 rats (Sprague Dawley) with T2D | 1) Control group fed normal diet<br>2) Group fed HFD<br>3) Group supplemented with 80 mg/kg/day curcumin<br>4) Group treated with                                                                                                                                              | Plasma blood test                                | 60 - 75 days | <ul style="list-style-type: none"> <li>• TNF-<math>\alpha</math> levels attenuation, glucose tolerance and improved lipid profile in curcumin treatment;</li> <li>• Curcumin effects comparable to those of rosiglitazone in T2D.</li> </ul>                          | [213] |

|                           |                                                                       |                                                       |                                                                                                                                                                    |                                                                                                                                                                                                             |                                                                                    |                                                                                                                                                                                                                                                                                                                                                                                                                                       |                                                                                                                                                                   |       |
|---------------------------|-----------------------------------------------------------------------|-------------------------------------------------------|--------------------------------------------------------------------------------------------------------------------------------------------------------------------|-------------------------------------------------------------------------------------------------------------------------------------------------------------------------------------------------------------|------------------------------------------------------------------------------------|---------------------------------------------------------------------------------------------------------------------------------------------------------------------------------------------------------------------------------------------------------------------------------------------------------------------------------------------------------------------------------------------------------------------------------------|-------------------------------------------------------------------------------------------------------------------------------------------------------------------|-------|
|                           |                                                                       |                                                       |                                                                                                                                                                    | 1 mg/kg/day rosiglitazone                                                                                                                                                                                   |                                                                                    |                                                                                                                                                                                                                                                                                                                                                                                                                                       |                                                                                                                                                                   |       |
|                           |                                                                       |                                                       |                                                                                                                                                                    | 5) Group treated with 80 mg/kg/day curcumin + 1 mg/kg/day rosiglitazone                                                                                                                                     |                                                                                    |                                                                                                                                                                                                                                                                                                                                                                                                                                       |                                                                                                                                                                   |       |
| New South Wales           | 2 × 2 factorial, randomized, double-blinded, placebo-controlled study | 64 participants at high risk of developing diabetes   | PL) placebo<br>CC) curcumin tablets (180 mg/day)<br>FO) 1.2 g DHA + EPA<br>CC+FO) dual-action tablets of 180 mg curcumin plus 2 capsules providing 1.2 g DHA + EPA | Erythrocyte fatty acid analysis                                                                                                                                                                             | 12 weeks                                                                           | <ul style="list-style-type: none"><li>• Circulating levels of GSK-3β were significantly lower in the curcumin group;</li><li>• Uncertain benefit on glycaemic control regarding the complementarity of curcumin and omega-3 polyunsaturated fatty acids</li></ul>                                                                                                                                                                     | [214]                                                                                                                                                             |       |
| Iran                      | Randomized double-blind clinical trial                                | 50                                                    | <ul style="list-style-type: none"><li>• 80 mg/day of nanocurcumin</li></ul>                                                                                        | Blood sample and anthropometric measurements                                                                                                                                                                | 12 weeks                                                                           | <ul style="list-style-type: none"><li>• Reduced mean change in triglyceride levels and pancreatic β-cell function;</li><li>• No significant differences in anthropometric measurements, blood pressure and biochemical factors.</li></ul>                                                                                                                                                                                             | [216]                                                                                                                                                             |       |
| France                    | <i>In vivo</i> study                                                  | 48 mice                                               | <ul style="list-style-type: none"><li>• Risperidone</li><li>• Risperidone + curcumin (0,5 % day)</li></ul>                                                         | Inguinal, periovarian adipose tissues and liver collected for biochemical and histological examination                                                                                                      | 22 weeks                                                                           | <ul style="list-style-type: none"><li>• Reduction of risperidone-induced hepatomegaly by suppression of the ability to induce hepatic overexpression of enzymes involved in lipid metabolism (LXRα, FAS, ACC1, LPL, PPARγ, ACO, SREBP-2);</li><li>• Decreased glucose intolerance and triglyceridemia;</li><li>• Decrease in values serum markers of hepatotoxicity and hepatic pro-inflammatory transcription factor NFκB.</li></ul> | [217]                                                                                                                                                             |       |
| Prebiotics and Probiotics | Iran                                                                  | Randomized double-blind parallel-group clinical trial | 120 adults                                                                                                                                                         | 6 g/day of probiotics containing freeze-dried <i>Lactobacillus acidophilus</i> , <i>Bifidobacterium bifidum</i> , <i>Bifidobacterium lactis</i> and <i>Bifidobacter longum</i> (1.5 × 10 <sup>9</sup> each) | Analysis of blood pressure and plasma lipid and lipoprotein concentrations testing | 24 week (intervention period) 36 week (follow-up)                                                                                                                                                                                                                                                                                                                                                                                     | Reduction in the prevalence of hyperglycemia in the probiotic and symbiotic groups and a decrease in the tendency to develop hypertension in the probiotic group. | [218] |

|       |                                                                            |    |                                                                                           |                                                                          |          |                                                                      |       |
|-------|----------------------------------------------------------------------------|----|-------------------------------------------------------------------------------------------|--------------------------------------------------------------------------|----------|----------------------------------------------------------------------|-------|
| Spain | Randomized, double-blind crossover placebo-controlled, single-center trial | 53 | <i>L. reuteri</i> V3401 ( $5 \times 10^9$ colony-forming units)<br>+<br>Healthy lifestyle | Biochemical characteristics and inflammatory biomarkers in blood samples | 12 weeks | IL-6 and sVCAM effects, but no differences in the clinical features. | [219] |
|-------|----------------------------------------------------------------------------|----|-------------------------------------------------------------------------------------------|--------------------------------------------------------------------------|----------|----------------------------------------------------------------------|-------|

EVOO: extra virgin olive oil; BP: Blood pressure; TPE: total polyphenol excretion; FFQ: food frequency questionnaires; eNOS: endothelial nitric oxide synthase; CVD: cardiovascular disease; MI: Myocardial Infarction; NO: Nitric Oxide; TPE: total polyphenol excretion; CHD: Coronary heart disease; HF: High flavanol; IF: Intermediate flavanol; LF: Low flavanol; CFs: Cocoa flavanols; BW: Body weight; BMI: Body mass index; CAC: coronary artery calcification; CGA: Chlorogenic acids; G6Pase: Glucose-6-phosphatase; HbA1c: glycosylated hemoglobin; LDL: Low-density lipoprotein; LDL-C: Low-density lipoprotein cholesterol; HDL: High-density lipoprotein; HDL-C: High-density lipoprotein cholesterol; 5-CQA: 5-caffeoylquinic acid; SBP: systolic blood pressure; DBP: diastolic blood pressure; MCE: mitotic clonal expansion; PPAR $\gamma$ : Peroxisome Proliferator-Activated Receptor Gamma; C/EBP $\alpha$ : CCAAT-enhancer binding protein  $\alpha$ ; IL-6: Interleukin 6; TNF $\alpha$ : Tumor necrosis factor alpha; MDA: Malondialdehyde; CRP: C-Reactive Protein; TG: triglyceride; HFD: High-fat diet; GSK-3 $\beta$ : Glycogen synthase kinase-3 beta; ALA: Alpha linolenic acid; DHA: Docosahexaenoic acid; EPA: Eicosapentaenoic acid;  $\omega$ -3PUFAs:  $\omega$ 3-polyunsaturated fatty acids; LXR $\alpha$ : Liver X receptor alpha; FAS: Fas cell surface death receptor; ACC1: Acetyl-CoA carboxylase; LPL: Lipoprotein lipase; ACO: Acyl CoA Oxidase; SREBP-2: Sterol regulatory element-binding transcription factor 1; TAC: Total antioxidant capacity; FLI: fatty liver index; ALE: Artichoke (*Cynara scolymus*) leaf extracts; FBS: Fetal bovine serum; GPx: Glutathioneperoxidase; SOD: superoxide dismutase; RBC: Red blood cells; HFHC: High fat and High carbohydrates ; AMPKa: AMP-activated protein Kinase; T2D: Type 2 diabetes; PGC-1 $\alpha$ : Peroxisome proliferator-activated receptor-gamma coactivator; WT: Wild type; DHPPA: 3,4 dihydroxyphenylpropionic acid; DPP-4: Dipeptidyl peptidase-4; GLP-1: Glucagon-like peptide 1; GIP: Gastric inhibitory polypeptide; sVCAM: Soluble Vascular Cell Adhesion Molecule-1; WC: Waist circumference
